# Supplementary material
Source: PubMed Central journal article supplement (PMC8925016)
Supplement: NIHMS1781897-supplement-Supplementary_Figures_and_Table.pdf [file NIHMS1781897-supplement-Supplementary_Figures_and_Table.pdf]

**Figure S1.** Summary of associations for three polygenic risk score (PRS) models of posttraumatic stress disorder re-experiencing (PTSD<sub>REX</sub>) predicting traumatic loss-related PTSD: (**Model 1**) was covaried for age, sex, and 10 principal components of ancestry, (**Model 2**) was additionally covaried for attachment style, and (**Model 3**) was additionally covaried for attachment style and the interactive term of attachment style by PTSD<sub>REX</sub> PRS. The most significant gene set is labeled.

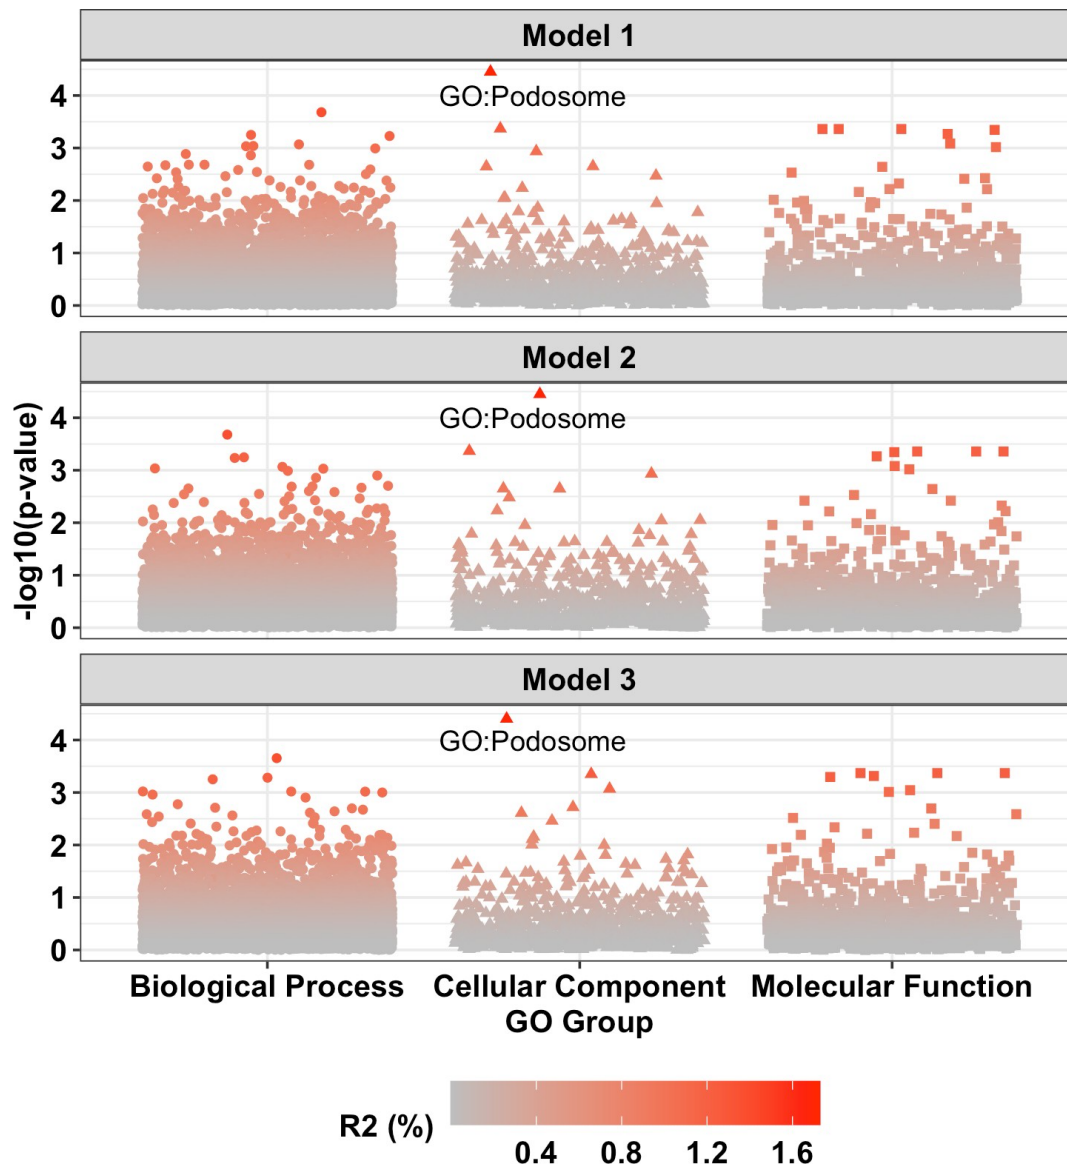

**Figure S2.** Representative Gene Ontology network for biological processes detected by models for PTSD<sub>REX</sub> PRS predicting traumatic loss-related PTSD. Due to lack of distinct observational network sub-clusters, network node positions were adjusted to improve visual clarity.

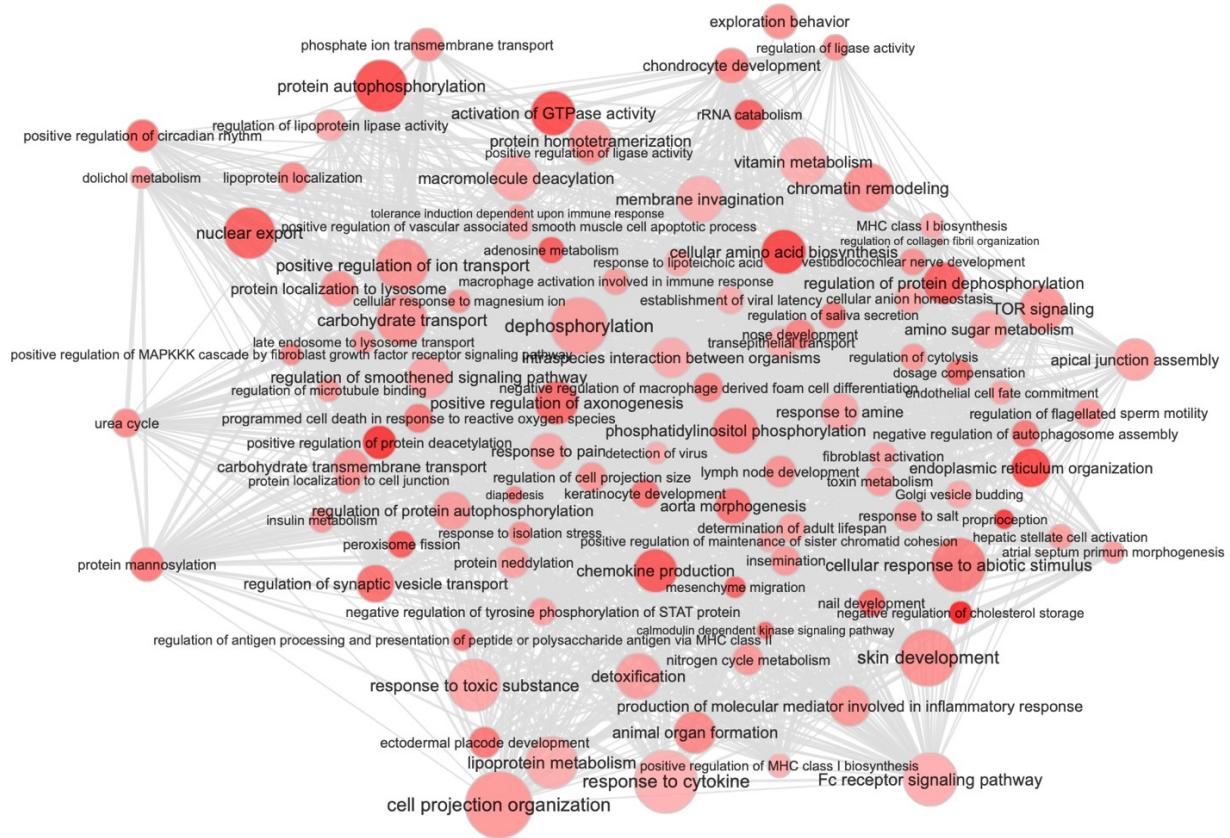

**Figure S3.** Representative Gene Ontology network for cellular components detected by models for PTSD<sub>REX</sub> PRS predicting traumatic loss-related PTSD.

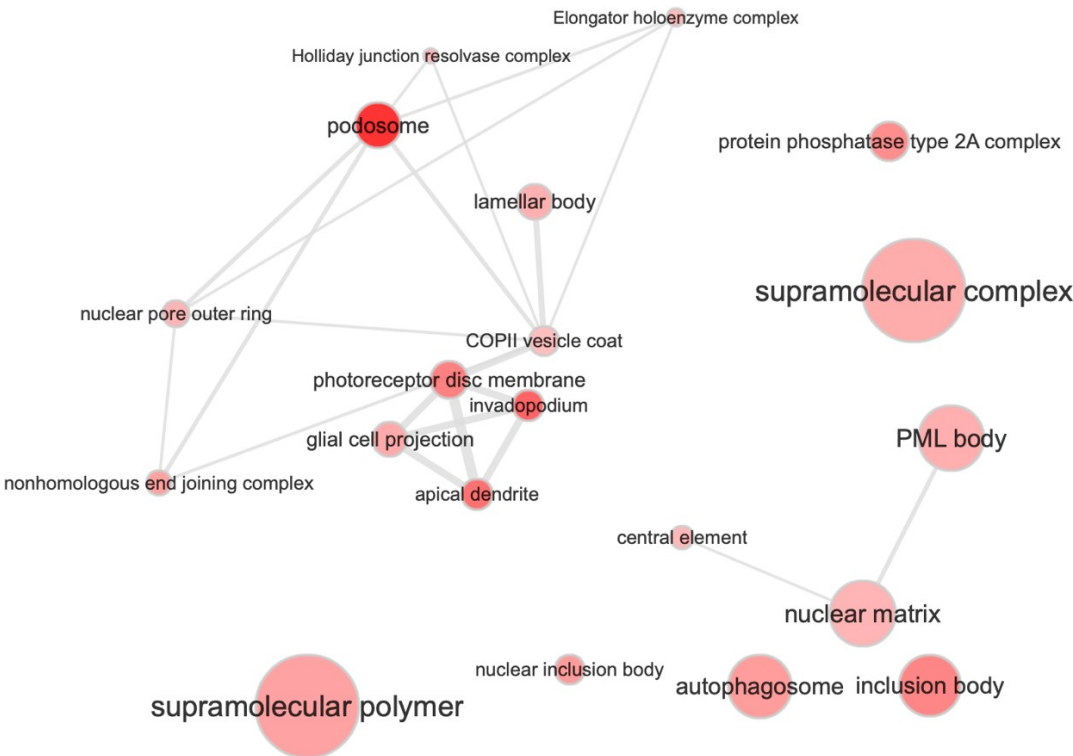

**Figure S4.** Representative Gene Ontology network for molecular functions detected by models for PTSD<sub>REX</sub> PRS predicting traumatic loss-related PTSD.

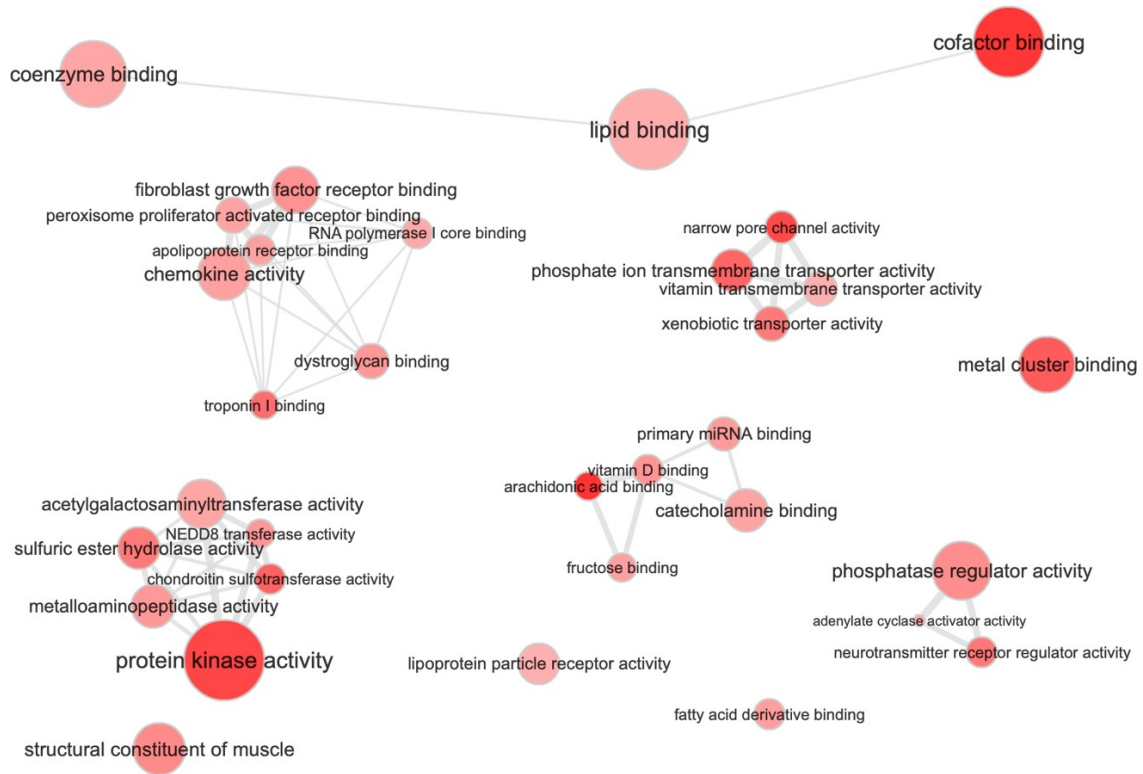

**Table S1.** Full list of genes represented in gene ontologies (GO) from **Table 2** and **Figures S1-S4** for gene-sets identified by polygenic risk score (PRS) models of posttraumatic stress disorder re-experiencing (PTSDREX).

| Type         | Biological Process                  |                                            |                |                      | Cellular Component |                         |                         |              | Molecular Function      |                                  |                              |                                         |                          |                                               |                     |                  |                                |
|--------------|-------------------------------------|--------------------------------------------|----------------|----------------------|--------------------|-------------------------|-------------------------|--------------|-------------------------|----------------------------------|------------------------------|-----------------------------------------|--------------------------|-----------------------------------------------|---------------------|------------------|--------------------------------|
| GO           | 7029                                | 10887                                      | 19230          | 35640                | 2102               | 99080                   | 99081                   | 71437        | 4672                    | 8307                             | 22842                        | 30228                                   | 50544                    | 99602                                         | 31013               | 48037            | 1901567                        |
| Description  | Endo-plasmic reticulum organization | Negative regulation of cholesterol storage | Proprioception | Exploration behavior | Podosome           | Supra-molecular complex | Supra-molecular polymer | Invadopodium | Protein kinase activity | Structural constituent of muscle | Narrow-pore channel activity | Lipo-protein particle receptor activity | Arachidonic acid binding | Neuro-transmitter receptor regulator activity | Trop-onin I binding | Cofactor binding | Fatty acid deriva-tive binding |
| <b>Genes</b> | RTN3                                | NR1H3                                      | FXN            | CHL1                 | ACTR2              | ARHGEF2                 | KIF28P                  | ACTR2        | BK3                     | NEBL                             | KCNK7                        | STAB1                                   | ALOX5AP                  | RTN4                                          | NR1H4               | RTN4             | ACOT7                          |
|              | TRDN                                | TTC39B                                     | GBX1           | CHRNA4               | ADAM8              | ACTL8                   | KRTAP4_9                | PDPN         | SGK2                    | MYOM3                            | PANX1                        | LRP10                                   | PPARG                    | TRDN                                          | TTC39B              | TRDN             | ACOT12                         |
|              | RAB10                               | ABCA1                                      | TMEM150C       | LRRK2                | AFAP1L1            | ACTN2                   | DNAJB6                  | AFAP1L1      | HIPK3                   | MYL6B                            | NALCN                        | ILDRI                                   | S100A8                   | RAB11                                         | ABCA2               | RAB11            | DBI                            |
|              | LMAN2                               | MIR146A                                    | POU4F1         | BRINP1               | PALLD              | AGO1                    | KRTAP9_7                | DPP4         | CDK2                    | CSRPI                            | KCNK18                       | LRP12                                   | STX3                     | LMAN3                                         | MIR146A             | LMAN3            | ALOX5AP                        |
|              | ZFYVE27                             | PPARA                                      |                | DLG4                 | SH3PXD2B           | AGO3                    | KRTAP16_1               | FAP          | CDK3                    | DAG1                             | KCNK1                        | LDLR                                    | ZFYVE28                  | PPARA                                         | ZFYVE28             | ACOT11           |                                |
|              | LRRK2                               | PPARD                                      |                | ABAT                 | GSN                | AHCTF1                  | KRTAP9_6                | RUFY3        | TNK2                    | SYNM                             | KCNK2                        | LRP1                                    | LRRK3                    | PPARD                                         | LRRK3               | GCDH             |                                |
|              | TOR1AIP2                            | PPARG                                      |                | DPP4                 | HNRNPK             | ASPM                    | KRTAP29_1               | ITGA3        | CDK4                    | PDLIM3                           | KCNK3                        | LRP6                                    | TOR1AIP3                 | PPARG                                         | TOR1AIP3            | ACAD9            |                                |
|              | SPTSSB                              | NR1H2                                      |                | GAD1                 | LCPI               | ATP2B4                  | DNM1L                   | ITGB1        | CDK6                    | MYLPF                            | KCNK4                        | STAB2                                   | SPTSSB                   | NR1H3                                         | SPTSSB              | HADHA            |                                |
|              | MAPK15                              | ABCG1                                      |                | GIP                  | ASAP1              | BCL10                   | ABCC9                   | PAK1         | CDK7                    | KRT19                            | KCNK9                        | CXCL16                                  | MAPK16                   | ABCG2                                         | MAPK16              | ACADL            |                                |
|              | SEC31A                              |                                            |                | ABL2                 | BIN2               | CACNA1S                 | MYZAP                   | PLAUR        | CDK8                    | ASPH                             | KCNK10                       | SORL1                                   | SEC31A                   |                                               | SEC31A              | ACBD7            |                                |
|              | RAB3GAP1                            |                                            |                | APOE                 | PTPN12             | CAMSAP2                 | ARPC3                   | FSCN1        | CDK9                    | MYBPC1                           | KCNK13                       | VLDLR                                   | RAB3GAP2                 |                                               | RAB3GAP2            | ALDH6A1          |                                |
|              | RAB18                               |                                            |                | ITGA3                | KIF9               | CAPZB                   | KIF20A                  | SVIL         | CDKN1A                  | MYBPC2                           | KCNK12                       | LRP8                                    | RAB19                    |                                               | RAB19               | PPARG            |                                |
|              | TMCC1                               |                                            |                | PRKCE                | SH3GL1             | CASQ1                   | DNAL4                   | EZR          | SPEG                    | MYBPC3                           | RHAG                         | CD36                                    | TMCC2                    |                                               | TMCC2               | S100A8           |                                |
|              | ARL6IP1                             |                                            |                | SLC4A10              | FSCN1              | CASQ2                   | LRPPRC                  |              | PAK4                    | MYBPH                            | KCNK16                       | SCARB1                                  | ARL6IP2                  |                                               | ARL6IP2             | SCP2             |                                |
|              | RAB3GAP2                            |                                            |                | JPH3                 | SRC                | CCDC181                 | SPRY2                   |              | TESK2                   | MYH8                             | TMEM175                      |                                         | RAB3GAP3                 |                                               | RAB3GAP3            | ACBD3            |                                |
|              | GAK                                 |                                            |                | C12orf10             | SVIL               | CCSAP                   | CDK2AP2                 |              | MERTK                   | MYH11                            | KCNK5                        |                                         | GAK                      |                                               | GAK                 | SOAT1            |                                |
|              | ATL3                                |                                            |                | TNR                  | TJP1               | CCT3                    | APC2                    |              | STK25                   | MYL1                             | KCNK17                       |                                         | ATL4                     |                                               | ATL4                | STX3             |                                |
|              | SEC31B                              |                                            |                | EIF4A3               | VCAM1              | CDC42                   | KATNB1                  |              | CAMKK2                  | MYL2                             | KCNK6                        |                                         | SEC31B                   |                                               | SEC31B              | ACBD4            |                                |
|              | TOR1B                               |                                            |                |                      | VCL                | CENPF                   | KLHL41                  |              | MAP3K2                  | MYL3                             |                              |                                         | TOR1B                    |                                               | TOR1B               | PNPLA3           |                                |
|              | SEC61A1                             |                                            |                |                      | FERMT3             | CEP170                  | TUBA1B                  |              | PLK2                    | MYL5                             |                              |                                         | SEC61A2                  |                                               | SEC61A2             | ACBD6            |                                |
|              | MIA3                                |                                            |                |                      | SCIN               | CHTOP                   | TUBB3                   |              | NEK6                    | MYL6                             |                              |                                         | MIA4                     |                                               | MIA4                | ACBD5            |                                |
|              | ATL1                                |                                            |                |                      | ARHGEF2            | COL11A1                 | MYL12B                  |              | CCNI                    | NEB                              |                              |                                         | ATL2                     |                                               | ATL2                |                  |                                |
|              | REEP2                               |                                            |                |                      | LPXN               | CSRPI                   | NDRG1                   |              | TLK2                    | PLEC                             |                              |                                         | REEP3                    |                                               | REEP3               |                  |                                |
|              | STX18                               |                                            |                |                      | SH3PXD2A           | DHX9                    | TUBGCP3                 |              | RIPK3                   | JPH1                             |                              |                                         | STX19                    |                                               | STX19               |                  |                                |
|              | TMEM38B                             |                                            |                |                      | WDR1               | DISC1                   | BAIAP2                  |              | CHEK1                   | SMTN                             |                              |                                         | TMEM38B                  |                                               | TMEM38B             |                  |                                |
|              | TMEM33                              |                                            |                |                      |                    | DNAH14                  | APPB2                   |              | CIT                     | TPM1                             |                              |                                         | TMEM34                   |                                               | TMEM34              |                  |                                |
|              | CCDC47                              |                                            |                |                      |                    | DNM3                    | FBLN5                   |              | MAP4K5                  | TPM2                             |                              |                                         | CCDC48                   |                                               | CCDC48              |                  |                                |
|              | RTN4                                |                                            |                |                      |                    | DVL1                    | NEBL                    |              | MAP4K1                  | TPM4                             |                              |                                         | RTN5                     |                                               | RTN5                |                  |                                |
|              | ATL2                                |                                            |                |                      |                    | DYRK3                   | GLRX3                   |              | CHEK2                   | TTN                              |                              |                                         | ATL3                     |                                               | ATL3                |                  |                                |
|              | SGTA                                |                                            |                |                      |                    | ENO1                    | DCTN2                   |              | IRAK3                   | CSRPI                            |                              |                                         | SGTA                     |                                               | SGTA                |                  |                                |
|              | REEP1                               |                                            |                |                      |                    | ESPN                    | ARFGEF2                 |              | AKAP13                  | CAPN3                            |                              |                                         | REEP2                    |                                               | REEP2               |                  |                                |
|              | BNIP1                               |                                            |                |                      |                    | FBXO28                  | CCT7                    |              | STK38                   | OBSCN                            |                              |                                         | BNIP2                    |                                               | BNIP2               |                  |                                |
|              | TMEM38A                             |                                            |                |                      |                    | FLG                     | CCT4                    |              | CHUK                    | SORBS2                           |                              |                                         | TMEM38A                  |                                               | TMEM38A             |                  |                                |
|              | BAG6                                |                                            |                |                      |                    | GNG12                   | CCT2                    |              | ALPK2                   | MYOM1                            |                              |                                         | BAG7                     |                                               | BAG7                |                  |                                |
|              | LMAN1L                              |                                            |                |                      |                    | HAX1                    | PDLIM5                  |              | CLK1                    | ACTN2                            |                              |                                         | LMAN1L                   |                                               | LMAN1L              |                  |                                |
|              | LMAN2L                              |                                            |                |                      |                    | HOOK1                   | SPAG5                   |              | CLK2                    | ACTN3                            |                              |                                         | LMAN2L                   |                                               | LMAN2L              |                  |                                |
|              | CASQ1                               |                                            |                |                      |                    | IFFO2                   | CENPE                   |              | CLK3                    | NEXN                             |                              |                                         | CASQ2                    |                                               | CASQ2               |                  |                                |
|              | JAGN1                               |                                            |                |                      |                    | IGFN1                   | GAS2L1                  |              | LRRK2                   | MYOM2                            |                              |                                         | JAGN2                    |                                               | JAGN2               |                  |                                |
|              | CAV2                                |                                            |                |                      |                    | ITGB3BP                 | RGS14                   |              | CSNK1A1L                |                                  |                              |                                         | CAV3                     |                                               | CAV3                |                  |                                |



| Type | Biological Process |       |       |       | Cellular Component |       |       |       | Molecular Function |      |       |       |       |       |       |       |         |
|------|--------------------|-------|-------|-------|--------------------|-------|-------|-------|--------------------|------|-------|-------|-------|-------|-------|-------|---------|
| GO   | 7029               | 10887 | 19230 | 35640 | 2102               | 99080 | 99081 | 71437 | 4672               | 8307 | 22842 | 30228 | 50544 | 99602 | 31013 | 48037 | 1901567 |

**Genes**

|          |         |         |
|----------|---------|---------|
| TBCE     | XIRP2   | AKT1    |
| TDRD5    | COL8A1  | ERCC3   |
| TDRKH    | COL11A1 | AKT2    |
| TMOD4    | COL11A2 | ERN1    |
| TNNI1    | KLHL40  | PTK2B   |
| TNNT2    | SHROOM1 | EFEMP1  |
| TPM3     | ADORA2A | MMD2    |
| TPR      | CRHBP   | FER     |
| TRIM63   | MYL6B   | FES     |
| TTL7     | NEK7    | MAPK15  |
| UHMK1    | DYNLL2  | FGFR1   |
| WDR47    | KRT72   | FGFR3   |
| YBX1     | CRYAB   | FGFR2   |
| YTHDF2   | PARP4   | FGFR4   |
| ACTG2    | KRT80   | FGR     |
| ANKRD23  | CSNK1A1 | AAK1    |
| BARD1    | CSRP1   | LMTK2   |
| BIN1     | DNAH2   | ICK     |
| BMP10    | KIF18B  | FASTKD2 |
| CALM2    | WIPF2   | MAST1   |
| CCT4     | KRT25   | STK38L  |
| CCT7     | KLC3    | MAST3   |
| CENPA    | ADRA1A  | TNIK    |
| CENPO    | CTNNB1  | SMG1    |
| CLASP1   | TTC30B  | CDK19   |
| COL3A1   | RMDN2   | MAST2   |
| COL4A3   | UPP2    | PASK    |
| COL4A4   | JAKMIP1 | FLT1    |
| COL5A2   | CYLD    | FLT3    |
| DCDC2C   | CYP2A6  | SIK2    |
| DCTN1    | CAMSAP1 | FLT4    |
| DDX1     | TTL11   | SIK3    |
| DES      | DAG1    | BRD4    |
| DIS3L2   | DAPK3   | MMD     |
| DNAH6    | EML5    | CDK20   |
| DNAH7    | KRT28   | DAPK2   |
| DYNC1I2  | DBN1    | PRKD3   |
| DYNC2LI1 | DCTN1   | ALK     |
| DYSF     | TTL9    | FRK     |
| EHBP1    | TTL8    | MTOR    |
| EML4     | DDX6    | ABL1    |
| EML6     | DCLK2   | FYN     |
| ESPNL    | DES     | ANKK1   |
| FAM161A  | SYNPO2  | PAN3    |
| FASTKD2  | DLG1    | DSTYK   |
| FHL2     | DNM1    | GAK     |
| FIGN     | DNAH5   | PRKD2   |
| GIGYF2   | DNAH6   | SOSTDC1 |
| GPATCH11 | DNAH8   | LATS2   |
| HDAC4    | DNAH9   | AMHR2   |
| HURP     | DYNC1H1 | ABL2    |
| HNRNPA3  | DYNC111 | EIF2AK1 |

| Type | Biological Process |       |       |       | Cellular Component |       |       |       | Molecular Function |      |       |       |       |       |       |       |         |
|------|--------------------|-------|-------|-------|--------------------|-------|-------|-------|--------------------|------|-------|-------|-------|-------|-------|-------|---------|
| GO   | 7029               | 10887 | 19230 | 35640 | 2102               | 99080 | 99081 | 71437 | 4672               | 8307 | 22842 | 30228 | 50544 | 99602 | 31013 | 48037 | 1901567 |

**Genes**

|          |          |        |
|----------|----------|--------|
| HOXD10   | DYNC112  | STK36  |
| KIF1A    | DYNC1L12 | STK39  |
| KIF3C    | DNM2     | STK32C |
| KIF5C    | DPYSL2   | KSR2   |
| KLHL41   | DPYSL3   | NEK8   |
| LRPPRC   | DSP      | EPHA10 |
| LTBP1    | DVL1     | EPHA6  |
| MAP2     | DNAH10   | GRK4   |
| MAPRE3   | AIF1     | GRK5   |
| MARCO    | ANKRD23  | GRK6   |
| MYL1     | ELN      | MKNK2  |
| MYO1B    | KCTD6    | HIPK2  |
| NCKAP1   | EML1     | TBK1   |
| NCKAP5   | MARK2    | GSK3A  |
| NEB      | DNAH12   | GSK3B  |
| OBSL1    | ENO1     | GTF2H3 |
| ORC2     | CMYA5    | GTF2H4 |
| POLR2D   | TUBB     | GUCY2C |
| POTEKP   | DMTN     | EEF2K  |
| PUM2     | EVPL     | PKN3   |
| RHOQ     | FBLN1    | HCK    |
| RMDN2    | FBN1     | HUNK   |
| ROCK2    | FBN2     | PIK3R4 |
| SCN1A    | SKA1     | MYLK4  |
| SCTR     | REEP3    | NEK5   |
| SLC1A4   | KIF6     | IGF1R  |
| SLC8A1   | ALDOA    | IGF2R  |
| SNRPG    | FHL2     | IKBKB  |
| SPAST    | FKBP1A   | INSR   |
| SPC25    | FKBP4    | INSRR  |
| SPTBN1   | WDR47    | IRAK2  |
| SUMO1    | MAPRE1   | ITK    |
| TIA1     | KIFAP3   | ITPKA  |
| TMEM214  | MAPRE3   | JAK1   |
| TRAPPC12 | HABP4    | JAK2   |
| TRIM54   | SIRT2    | JAK3   |
| TTC30A   | SHANK2   | MAST4  |
| TTC30B   | TRIM32   | KDR    |
| TTLL4    | TPX2     | KIT    |
| TTN      | NINL     | SBK1   |
| TUBA4A   | MYH15    | LCK    |
| TUBA4B   | PALLD    | LIMK1  |
| UPP2     | KIF21B   | LIMK2  |
| WIPF1    | TTLL5    | LTBP1  |
| XIRP2    | KIF1B    | LYN    |
| XPO1     | SARM1    | MAK    |
| ZNF804A  | FLG      | MARK1  |
| KIF9     | CLASP2   | MARK3  |
| ACKR2    | FLNB     | MATK   |
| BFSP2    | FLNC     | PIM3   |
| CACNA1D  | SYNE2    | MAP3K1 |
| CAV3     | COBL     | MAP3K3 |



| Type | Biological Process |       |       |       | Cellular Component |       |       |       | Molecular Function |      |       |       |       |       |       |       |         |
|------|--------------------|-------|-------|-------|--------------------|-------|-------|-------|--------------------|------|-------|-------|-------|-------|-------|-------|---------|
| GO   | 7029               | 10887 | 19230 | 35640 | 2102               | 99080 | 99081 | 71437 | 4672               | 8307 | 22842 | 30228 | 50544 | 99602 | 31013 | 48037 | 1901567 |

**Genes**

|         |          |         |
|---------|----------|---------|
| CCDC66  | CAMSAP2  | MAP3K4  |
| CLASP2  | MTUS2    | MAP3K5  |
| CLRN1   | EHBP1    | MET     |
| COL7A1  | KIF13B   | MAP3K9  |
| COL8A1  | FKBP15   | MAP3K10 |
| CTNNB1  | RPGRIP1L | MAP3K11 |
| DAG1    | CLASP1   | MNAT1   |
| DCP1A   | SYNM     | MOS     |
| DHX30   | SYNE1    | EIF2AK4 |
| DHX36   | OBSL1    | MST1R   |
| DLG1    | SPECC1L  | MUSK    |
| DNAH1   | COTL1    | MYLK    |
| DNAH12  | RHOQ     | ATM     |
| DYNC1L1 | MACF1    | NEK1    |
| FLNB    | CASP14   | NEK2    |
| FXR1    | CORO1C   | NEK3    |
| HCLS1   | CD2AP    | NME2    |
| KAT2B   | EML2     | NPR1    |
| KCTD6   | GAS2L2   | NPR2    |
| KIF15   | FRG1     | NTRK1   |
| KLHL40  | NEIL2    | NTRK2   |
| KY      | FYN      | NTRK3   |
| LIMD1   | EHBP1L1  | ROR2    |
| LMOD3   | NPNT     | DDR2    |
| LSM3    | LMOD1    | WEE2    |
| MAP4    | TTL1     | MINK1   |
| MAP6D1  | IFFO1    | PAK1    |
| MBNL1   | ASPM     | PAK2    |
| MYH15   | BOD1L1   | TNNI3K  |
| MYL3    | TPGS2    | VRK3    |
| NCKIPSD | DNAH1    | CRIM1   |
| NFKBIZ  | KRT23    | CDKL3   |
| NICN1   | DNM3     | CDK17   |
| PLS1    | LDLRAP1  | CDK18   |
| RASSF1  | TTL3     | TAOK3   |
| RPL15   | KIF26A   | PRKAG2  |
| SCN5A   | GAS2     | PDGFRA  |
| SEC13   | GAS8     | PDGFRL  |
| SERP1   | FBXO22   | PDGFRB  |
| SRPRB   | NARF     | PDK1    |
| TIMP4   | CKAP2    | PDK2    |
| TRIM71  | GFAP     | PDK4    |
| TTL3    | DNAI1    | PDPK1   |
| TWF2    | STAU2    | NLK     |
| XRN1    | INVS     | CAB39   |
| WDR1    | DISC1    | CDK12   |
| PALLD   | TUBGC4   | CDK14   |
| ANK2    | SERP1    | PHKB    |
| BOD1L1  | PDLIM3   | PHKG1   |
| CENPC   | BMP10    | PIK3C3  |
| CENPE   | BINI     | PIK3CA  |
| CENPU   | EML4     | PIM1    |

| Type | Biological Process |       |       |       | Cellular Component |       |       |       | Molecular Function |      |       |       |       |       |       |       |         |
|------|--------------------|-------|-------|-------|--------------------|-------|-------|-------|--------------------|------|-------|-------|-------|-------|-------|-------|---------|
| GO   | 7029               | 10887 | 19230 | 35640 | 2102               | 99080 | 99081 | 71437 | 4672               | 8307 | 22842 | 30228 | 50544 | 99602 | 31013 | 48037 | 1901567 |

**Genes**

|         |            |          |
|---------|------------|----------|
| CLOCK   | IGSF22     | PIK3CG   |
| DCLK2   | RASSF3     | PLK1     |
| EIF4E   | GAS2L3     | PRKAG3   |
| FHDC1   | CEP170B    | FGFRL1   |
| FRG1    | FBXL22     | MYO3A    |
| G3BP2   | HID1       | CSNK1G1  |
| GRSF1   | TTL6       | RIPK4    |
| HAUS3   | BOD1L2     | ATR      |
| JAKMIP1 | ODF3L2     | TRPM7    |
| LSM6    | KRTAP13_4  | SNRK     |
| MAD2L1  | GPER1      | ULK4     |
| MAP9    | CCDC66     | STK32B   |
| MYL5    | KIF4B      | STYK1    |
| MYOZ2   | ANK1       | STRADB   |
| NPNT    | FAM83H     | CDC42BPG |
| ODAM    | KRT6C      | BMP2K    |
| PABPC4L | ANK2       | PRKAA1   |
| PDLIM3  | ANK3       | PRKAB1   |
| PDLIM5  | RACGAP1    | PRKAB2   |
| PKD2    | GSK3A      | PRKACA   |
| PPP3CA  | TMOD4      | PRKACB   |
| RNF4    | TMOD3      | SCYL2    |
| SHROOM3 | TMOD2      | PRKAG1   |
| SLAIN2  | PARVB      | PRKCA    |
| SNCA    | MYL10A     | RIOK2    |
| SORBS2  | HOOK2      | PRKCB    |
| SYNP02  | PRICKLE4   | AXL      |
| ACTBL2  | HCK        | PRKCD    |
| APC     | HCLS1      | PRKCE    |
| BOD1    | KRT73      | PRKCG    |
| CCNB1   | APC        | PRKCH    |
| CENPH   | HRC        | PRKCI    |
| CENPK   | BIRC5      | PKN1     |
| CMYA5   | KRTAP11_1  | PKN2     |
| CNOT8   | KRTAP22_1  | PRKD1    |
| COL23A1 | KRT79      | PBK      |
| CRHBP   | ADAMTSL5   | PRKCQ    |
| CSNK1A1 | ESPNL      | PRKCC    |
| DBN1    | KY         | PRKDC    |
| DCP2    | DCDC1      | PRKGI    |
| DNAH5   | FMN1       | PRKG2    |
| DPYSL3  | SMTNL2     | MAPK1    |
| FBN2    | KRT27      | MAPK3    |
| G3BP1   | NCKAP5     | MAPK4    |
| GHR     | ACTBL2     | MAPK6    |
| HOMER1  | KIF24      | MAPK8    |
| KCNN2   | TUBB8      | MAPK11   |
| KIF20A  | KRT26      | MAPK9    |
| KIF2A   | KRTAP12_2  | MAPK10   |
| KIF3A   | KRTAP12_1  | MAP2K1   |
| KIF4B   | KRTAP10_10 | MAP2K2   |
| LARP1   | INCENP     | MAP2K3   |

| Type | Biological Process |       |       |       | Cellular Component |       |       |       | Molecular Function |      |       |       |       |       |       |       |         |
|------|--------------------|-------|-------|-------|--------------------|-------|-------|-------|--------------------|------|-------|-------|-------|-------|-------|-------|---------|
| GO   | 7029               | 10887 | 19230 | 35640 | 2102               | 99080 | 99081 | 71437 | 4672               | 8307 | 22842 | 30228 | 50544 | 99602 | 31013 | 48037 | 1901567 |

**Genes**

|          |            |         |
|----------|------------|---------|
| LMNB1    | IDO1       | MAP2K5  |
| MAP1B    | EIF6       | MAP2K6  |
| MCC      | JUP        | MAP2K7  |
| MTMR12   | KRT77      | EIF2AK2 |
| MYOZ3    | KIF7       | TEX14   |
| NSUN2    | KCNE1      | STK31   |
| NUDCD2   | LRRC10     | PSKH1   |
| PDLIM4   | KCNN2      | PAK6    |
| PDLIM7   | KIF2A      | FAM20C  |
| REEP2    | KIF3C      | CAMK1D  |
| RGS14    | KIF5A      | ADCK1   |
| SHROOM1  | KIF5B      | CAMK1G  |
| SNCAIP   | KIF5C      | CLK4    |
| SPDL1    | KIFC3      | PTK2    |
| SQSTM1   | KLC1       | PTK6    |
| SYNPO    | KIF11      | ALPK3   |
| TBCA     | KIFC1      | PTK7    |
| TPPP     | KIF25      | TAOK1   |
| YTHDC2   | KIF22      | MARK4   |
| AIF1     | KRT1       | MAP4K2  |
| ATAT1    | KRT3       | MOK     |
| BAG2     | KRT6A      | RAF1    |
| CD2AP    | KRT6B      | RET     |
| CENPQ    | KRT7       | ROSI    |
| COL11A2  | KRT8       | BCR     |
| DCDC2    | KRT9       | RPS6KA1 |
| DNAH8    | KRT10      | RPS6KA2 |
| DSP      | KRT12      | RPS6KB1 |
| DST      | KRT13      | MAPK12  |
| DYNLT1   | KRT14      | CCL2    |
| EZR      | KRT15      | BLK     |
| FHL5     | KRTAP10_7  | MAP2K4  |
| FYN      | KRTAP10_9  | SGK1    |
| KATNA1   | KRTAP10_11 | CCNI2   |
| KIF13A   | KRTAP12_3  | SBK2    |
| KIF25    | KRTAP12_4  | PINK1   |
| KIF6     | KRT16      | SLA     |
| KIFC1    | KRTAP5_3   | CDK15   |
| KLC4     | KRTAP5_4   | WNK1    |
| LSM2     | KRT18      | WNK4    |
| MAP7     | KRT19      | WNK2    |
| MICAL1   | KRT31      | BMPR1A  |
| MYO6     | KRT32      | BMPR1B  |
| NUP43    | KRT33A     | BMPR2   |
| PRICKLE4 | KRT33B     | STK33   |
| SYNE1    | KRT34      | SRC     |
| TBCC     | KRT35      | SRMS    |
| TCTE3    | KRT82      | BRAF    |
| TDRD6    | KRTAP26_1  | SRPK2   |
| TTK      | KRT84      | NEK4    |
| TUBB     | KRT39      | STK3    |
| TUBB2A   | STMN1      | STK4    |

| Type | Biological Process |       |       |       | Cellular Component |       |       |       | Molecular Function |      |       |       |       |       |       |       |         |
|------|--------------------|-------|-------|-------|--------------------|-------|-------|-------|--------------------|------|-------|-------|-------|-------|-------|-------|---------|
| GO   | 7029               | 10887 | 19230 | 35640 | 2102               | 99080 | 99081 | 71437 | 4672               | 8307 | 22842 | 30228 | 50544 | 99602 | 31013 | 48037 | 1901567 |

**Genes**

|         |           |          |
|---------|-----------|----------|
| ZC3H12D | LCPI      | AURKA    |
| ACTB    | LMNA      | STK10    |
| ASZ1    | LMNB1     | STK11    |
| CALD1   | VMAC      | AURKC    |
| CCT6A   | EML6      | SYK      |
| CLIP2   | ARL3      | MAP3K7   |
| COBL    | LTBP1     | TEC      |
| COL1A2  | LUM       | BUB1B    |
| DNAH11  | MAP1A     | TEK      |
| DNAJB6  | MAP1B     | TGFBR1   |
| DYNC111 | MAP2      | TGFBR2   |
| ELN     | MAP4      | TGFBR3   |
| FLNC    | MAP6      | TOP1     |
| GPB1    | MAPT      | TRIO     |
| LMOD2   | MEFV      | TTK      |
| LRWD1   | MFAP1     | TTN      |
| MAD1L1  | MFAP4     | TXK      |
| MYL7    | MAP3K11   | TYK2     |
| PMS2    | MMP2      | TYRO3    |
| PSMA2   | KRTAP5_6  | VRK1     |
| PSMC2   | KRTAP5_11 | VRK2     |
| RAC1    | POTEKP    | WEE1     |
| RADIL   | LMOD2     | YES1     |
| SRI     | MYO1B     | ZAP70    |
| WASL    | MT3       | DDR1     |
| WIPF3   | MYBPC1    | MAPKAPK3 |
| ADRA1A  | MYBPC2    | CAD      |
| AGO2    | MYBPC3    | CAMKV    |
| ANK1    | MYBPH     | FASTKD3  |
| BIN3    | MYH2      | CCNJL    |
| CNOT7   | MYH3      | FASTKD1  |
| CSPP1   | MYH4      | LRRK1    |
| DCTN6   | MYH6      | PEAK1    |
| DLGAP2  | MYH7      | NEK11    |
| DMTN    | MYH8      | CNTD2    |
| DPYSL2  | MYH9      | MAP3K19  |
| EPPK1   | MYH10     | ALPK1    |
| FAM83H  | MYH11     | CAMK4    |
| FBXO32  | MYL1      | CAMK2A   |
| HOOK3   | MYL2      | CAMK2B   |
| HSF1    | MYL3      | CAB39L   |
| IDO1    | MYL4      | CAMK2D   |
| JPH1    | MYL5      | NUAK2    |
| KIF13B  | MYO1A     | CAMK2G   |
| KIFC2   | MYO1C     | CDC7     |
| MTBP    | MYO5A     | RPS6KL1  |
| MTUS1   | MYO6      | RIOK1    |
| MYOM2   | MYO9B     | TSSK1B   |
| NDRG1   | PPP1R12A  | TSSK6    |
| NEFL    | PPP1R12B  | OBSCN    |
| NEFM    | NEB       | ULK1     |
| NEIL2   | NEFM      | LTBP4    |

| Type | Biological Process |       |       |       | Cellular Component |       |       |       | Molecular Function |      |       |       |       |       |       |       |         |
|------|--------------------|-------|-------|-------|--------------------|-------|-------|-------|--------------------|------|-------|-------|-------|-------|-------|-------|---------|
| GO   | 7029               | 10887 | 19230 | 35640 | 2102               | 99080 | 99081 | 71437 | 4672               | 8307 | 22842 | 30228 | 50544 | 99602 | 31013 | 48037 | 1901567 |

**Genes**

|          |          |          |
|----------|----------|----------|
| ODF1     | NEFH     | CAMKK1   |
| PABPC1   | NEFL     | STK24    |
| PDLIM2   | NEK2     | DYRK3    |
| PINX1    | NME2     | BRSK1    |
| PIWIL2   | NOS1     | DYRK2    |
| PLEC     | NRAP     | TTBK1    |
| POLB     | ROR2     | PPP1R9B  |
| RBPMS    | NUMA1    | CDC42BPA |
| RMDN1    | ATP2B4   | MAP4K3   |
| RP1      | ODF1     | MASTL    |
| RP1L1    | ODF2     | CAMK1    |
| STAU2    | PAFAH1B1 | MYLK2    |
| SYBU     | COL5A3   | DCLK3    |
| TIGD5    | PAK1     | PSKH2    |
| TRIM55   | PAWR     | MAPKAPK5 |
| ZFAND1   | RMDN1    | CDK10    |
| HNRNPK   | DYNC1L1  | MKNK1    |
| AIF1L    | PCNT     | CDK13    |
| AKNA     | TUBD1    | TNK1     |
| C9orf72  | NIN      | RIPK2    |
| CAMSAP1  | NUSAP1   | RIOK3    |
| CDK5RAP2 | REEP2    | DYRK4    |
| CDK9     | KRT76    | TRIM24   |
| COL27A1  | HOOK1    | CCNK     |
| COL5A1   | PDE4B    | CDKL1    |
| DCTN3    | DCDC2    | NRP2     |
| DNAI1    | GTSE1    | NRP1     |
| DNM1     | NCKIPSD  | KSR1     |
| FBP2     | DYNC2L1  | CDK5R1   |
| FKBP15   | MYOZ2    | STK19    |
| HABP4    | TUBA8    | SQSTM1   |
| HAUS6    | PGM5     | CPNE3    |
| INVS     | PKD2     | PRPF4B   |
| KIF12    | PKP1     | CCNA2    |
| KIF24    | PKP2     | CCNB1    |
| KIF27    | PLEC     | CCND2    |
| NEK6     | PLK1     | CCND3    |
| ODF2     | PLS1     | CCNE1    |
| PGM5     | MYO3A    | RPS6KA4  |
| PHF2     | PNN      | CCNF     |
| RC3H2    | POLB     | KALRN    |
| ROR2     | KRT20    | CDKL2    |
| RPS6     | MTMR12   | ACVR1    |
| SHB      | INO80    | CCNG1    |
| TDRD7    | MAP10    | CCNG2    |
| TEK      | KIF1A    | CCNH     |
| TMOD1    | HAUS6    | MAP3K14  |
| TPM2     | NDE1     | BRSK2    |
| TRIM32   | BCAS3    | BAZ1B    |
| TSC1     | LRRC49   | MAP3K6   |
| TTL11    | TMEM214  | PKMYT1   |
| VCP      | PPL      | ADCK2    |

| Type | Biological Process |       |       |       | Cellular Component |       |       |       | Molecular Function |      |       |       |       |       |       |       |         |
|------|--------------------|-------|-------|-------|--------------------|-------|-------|-------|--------------------|------|-------|-------|-------|-------|-------|-------|---------|
| GO   | 7029               | 10887 | 19230 | 35640 | 2102               | 99080 | 99081 | 71437 | 4672               | 8307 | 22842 | 30228 | 50544 | 99602 | 31013 | 48037 | 1901567 |

**Genes**

|          |          |          |
|----------|----------|----------|
| VCL      | ODAM     | ACVR1B   |
| SVIL     | KIF26B   | LATS1    |
| ACTA2    | FIGN     | CCNB2    |
| ANAPC16  | RMDN3    | CCNE2    |
| ANK3     | PPP2R5A  | PKDCC    |
| ARL3     | PPP3CA   | DYRK1B   |
| BAG3     | PPP3CB   | MAP3K13  |
| BLNK     | MNS1     | NEK9     |
| BUB3     | TCP11L1  | MYLK3    |
| C10orf71 | DNAH3    | ACVR2A   |
| CDK1     | KIF27    | DCLK1    |
| GLRX3    | KIF21A   | STRADA   |
| INA      | KIF16B   | TBRG4    |
| KIF11    | SYBU     | RPS6KA5  |
| KIF20B   | RADIL    | MAPKAPK2 |
| KIF5B    | PARVA    | STK17B   |
| LARP4B   | CDK5RAP2 | STK17A   |
| LDB3     | CENPJ    | ACVR2B   |
| LZTS2    | BIN3     | TBCK     |
| MYO3A    | RCC2     | MAP4K4   |
| MYPN     | GNG12    | EIF2AK3  |
| NEBL     | MAP2K2   | ROCK2    |
| NRAP     | DNAH7    | CDC42BPB |
| NRP1     | LMOD3    | AATK     |
| PARD3    | PRPH     | IKBKE    |
| PDLIM1   | PSEN1    | SLK      |
| PPP3CB   | PSEN2    | RASSF2   |
| REEP3    | JPH1     | CDK1     |
| SPAG6    | PSMA6    | MELK     |
| SYNPO2L  | MDM1     | TLK1     |
| TDRD1    | KIF15    | NUAK1    |
| TIAL1    | JPH2     |          |
| TUBB8    | TRIM54   |          |
| TUBGCP2  | PBXIP1   |          |
| UPF2     | MTUS1    |          |
| ZWINT    | MICAL3   |          |
| ACTN3    | TWF1     |          |
| AHNAK    | KIF17    |          |
| ARNTL    | SLAIN2   |          |
| CAPRIN1  | VPS18    |          |
| CDK2AP2  | SHROOM3  |          |
| CEP57    | MYH7B    |          |
| CKAP5    | CAMSAP3  |          |
| CLMP     | NCKAP5L  |          |
| CRYAB    | CCDC181  |          |
| CSRP3    | SRPRB    |          |
| DCDC1    | MYL7     |          |
| DCPS     | RAC1     |          |
| DDX25    | RAC2     |          |
| DDX6     | RAC3     |          |
| DYNC2H1  | ACTA2    |          |
| EHBPI1   | TRPV4    |          |

| Type | Biological Process |       |       |       | Cellular Component |       |       |       | Molecular Function |      |       |       |       |       |       |       |         |
|------|--------------------|-------|-------|-------|--------------------|-------|-------|-------|--------------------|------|-------|-------|-------|-------|-------|-------|---------|
| GO   | 7029               | 10887 | 19230 | 35640 | 2102               | 99080 | 99081 | 71437 | 4672               | 8307 | 22842 | 30228 | 50544 | 99602 | 31013 | 48037 | 1901567 |

**Genes**

|          |           |
|----------|-----------|
| FEZ1     | ACTB      |
| GAS2     | RNF4      |
| IGSF22   | RP1       |
| INCENP   | RPL15     |
| JAM3     | CLIP1     |
| KIF18A   | RYR1      |
| KLC2     | RYR2      |
| MAP3K11  | RYR3      |
| MAP6     | BFSP1     |
| MARK2    | SCN1A     |
| MICAL2   | SCN5A     |
| MYBPC3   | SCN8A     |
| NUMA1    | SCO1      |
| NUP160   | SCTR      |
| NUP98    | BICD1     |
| PAK1     | SDC4      |
| PARVA    | KIF13A    |
| PATL1    | KIF9      |
| PITPNM1  | PDLIM2    |
| PIWIL4   | MAP1LC3B2 |
| RBM4     | KRTAP24_1 |
| SHANK2   | WIPF3     |
| STIM1    | DNAI2     |
| TCP11L1  | EVPLL     |
| TNNI2    | MICAL1    |
| TNNT3    | KLC2      |
| TRIM21   | SLC1A4    |
| TRIM5    | SLC2A1    |
| ZW10     | SLC4A1    |
| ABCC9    | SMTN      |
| ARHGEF25 | KRTAP4_11 |
| ARPC3    | SLC8A1    |
| ATXN2    | SLC8A3    |
| BICD1    | SNCA      |
| CACNA1C  | SNTB2     |
| CBX5     | DST       |
| CCT2     | SPAST     |
| CKAP4    | SPTBN1    |
| CLIP1    | SRC       |
| CNOT2    | SRI       |
| COL2A1   | SS18      |
| CORO1C   | STIM1     |
| DCP1B    | AURKA     |
| DCTN2    | AURKC     |
| DNAH10   | SVIL      |
| DNM1L    | TBCA      |
| DYNLL1   | TBCC      |
| FKBP4    | TBCD      |
| GAS2L3   | TBCE      |
| IFFO1    | TCTE3     |
| KIF21A   | DYNLT1    |
| KIF5A    | TEK       |

| Type | Biological Process |       |       |       | Cellular Component |       |       |       | Molecular Function |      |       |       |       |       |       |       |         |
|------|--------------------|-------|-------|-------|--------------------|-------|-------|-------|--------------------|------|-------|-------|-------|-------|-------|-------|---------|
| GO   | 7029               | 10887 | 19230 | 35640 | 2102               | 99080 | 99081 | 71437 | 4672               | 8307 | 22842 | 30228 | 50544 | 99602 | 31013 | 48037 | 1901567 |

**Genes**

|          |          |
|----------|----------|
| KNTC1    | TIAMI    |
| KRT1     | TIMP4    |
| KRT18    | ACTG1    |
| KRT3     | TMOD1    |
| KRT6A    | TNNI1    |
| KRT6B    | TNNI2    |
| KRT6C    | TNNI3    |
| KRT7     | TNNT1    |
| KRT71    | TNNT2    |
| KRT72    | TNNT3    |
| KRT73    | TPM1     |
| KRT74    | TPM2     |
| KRT75    | TPM3     |
| KRT76    | TPM4     |
| KRT77    | ACTG2    |
| KRT79    | CCT3     |
| KRT8     | TSC1     |
| KRT80    | TTN      |
| KRT82    | TUBA4A   |
| KRT84    | TUBA3C   |
| LARP4    | TUBB2A   |
| LRRC10   | KRTAP4_8 |
| LUM      | DCDC2C   |
| MAP1LC3B | CLRN1    |
| MDM1     | VCL      |
| MFAP5    | EZR      |
| MYBPC1   | WIPF1    |
| MYL2     | CLIP2    |
| MYL6B    | YES1     |
| MYO1A    | CACNA1C  |
| NAV3     | ZNF207   |
| NCKAP5L  | CACNA1D  |
| NOS1     | CACNA1S  |
| NUP107   | TUBA1A   |
| NUP37    | AHNAK    |
| PAN2     | FSD1     |
| PAWR     | HAUS3    |
| PIWIL1   | DYNC2H1  |
| PKP2     | TTL7     |
| PPP1CC   | MYH14    |
| PPP1R12A | CLMP     |
| PRPH     | CSPP1    |
| PYROXD1  | THSD4    |
| RACGAP1  | MAP9     |
| RASSF3   | PYROXD1  |
| RPL6     | MAP6D1   |
| RPLP0    | SYNPO2L  |
| SARNP    | ATAT1    |
| SCN8A    | CALD1    |
| TCHP     | TUBA4B   |
| TRPV4    | CALM1    |
| TUBA1A   | FHOD3    |



| Type | Biological Process |       |       |       | Cellular Component |       |       |       | Molecular Function |      |       |       |       |       |       |       |         |
|------|--------------------|-------|-------|-------|--------------------|-------|-------|-------|--------------------|------|-------|-------|-------|-------|-------|-------|---------|
| GO   | 7029               | 10887 | 19230 | 35640 | 2102               | 99080 | 99081 | 71437 | 4672               | 8307 | 22842 | 30228 | 50544 | 99602 | 31013 | 48037 | 1901567 |

**Genes**

TUBA1B CDK5RAP3  
 TUBA1C CSRP3  
 TWFI CALM2  
 LCP1 AKNA  
 CDC16 MFAP5  
 CENPJ CALM3  
 CHAMP1 FXR1  
 CKAP2 ACTN4  
 COL4A1 TUBB1  
 COL4A2 SYNC  
 GJB6 NDEL1  
 HSPH1 ACTL8  
 KATNAL1 MAP1LC3B  
 MTUS2 ADAMTS10  
 PAN3 KRTAP9\_9  
 PARP4 KIF18A  
 SPRY2 CAPN3  
 SUGT1 DYSF  
 TUBA3C CAPZB  
 TUBGCP3 KATNAL2  
 ACTN1 EPPK1  
 AHNAK2 AIF1L  
 CALM1 DNAL1  
 CEP170B RASSF5  
 CTSG DYNLRB2  
 DNAL1 TEKT1  
 DYNC1H1 JAM3  
 EIF2S1 ESPN  
 EML1 KRTAP3\_1  
 EML5 KRTAP3\_2  
 FBLN5 KRTAP9\_8  
 FERMT2 KRTAP17\_1  
 KIF26A OBSCN  
 KLC1 KATNAL1  
 MIS18BP1 ENKD1  
 MYH6 FAM161A  
 MYH7 BFSP2  
 NIN TCHP  
 PNN NICN1  
 PSEN1 HOOK3  
 PSMA6 CASQ1  
 REC8 LZTS2  
 SAMD4A CASQ2  
 SLC8A3 TUBB6  
 SYNE2 KIF2B  
 TDRD9 MYPN  
 TPPP2 TRIM55  
 TTLL5 TRIM63  
 ZFP36L1 SORBS2  
 AKAP13 MYO18B  
 BTBD1 PSRC1  
 BUB1B TUBA1C

| Type | Biological Process |       |       |       | Cellular Component |       |       |       | Molecular Function |      |       |       |       |       |       |       |         |
|------|--------------------|-------|-------|-------|--------------------|-------|-------|-------|--------------------|------|-------|-------|-------|-------|-------|-------|---------|
| GO   | 7029               | 10887 | 19230 | 35640 | 2102               | 99080 | 99081 | 71437 | 4672               | 8307 | 22842 | 30228 | 50544 | 99602 | 31013 | 48037 | 1901567 |

**Genes**

|         |          |
|---------|----------|
| CAPN3   | LMNB2    |
| CPEB1   | KLHL22   |
| CTSH    | TIGD5    |
| EDC3    | KCNAB2   |
| EID1    | KRTAP9_4 |
| EXD1    | KRTAP4_5 |
| FBN1    | KRTAP3_3 |
| FBXL22  | COL27A1  |
| FBXO22  | FBF1     |
| FMN1    | MYLK2    |
| GABPB1  | TUBGCP6  |
| INO80   | FHDC1    |
| IQGAP1  | PDLIM4   |
| KIF23   | CAV3     |
| KIF7    | SKAP1    |
| KNSTRN  | DNAH17   |
| LRRRC49 | DYNLL1   |
| MAP1A   | MARCO    |
| MFAP1   | KRT38    |
| MNS1    | KRT37    |
| MYO5A   | KRT36    |
| MYZAP   | ACTN1    |
| NUSAP1  | DNAH11   |
| PATL2   | MYH13    |
| PRC1    | MYOM1    |
| PSMA4   | RAB11A   |
| RAB11A  | FBP2     |
| RMDN3   | ACTN2    |
| RYR3    | IQGAP1   |
| SIN3A   | NRP1     |
| SYNM    | KAT2B    |
| THSD4   | CDK5R1   |
| TMOD2   | SYNJ1    |
| TMOD3   | SQSTM1   |
| TP53BP1 | CDC16    |
| TPM1    | ACTN3    |
| TUBGCP4 | BCL10    |
| TUBGCP5 | WASL     |
| USP3    | RSPH1    |
| VPS18   | NAV3     |
| WHAMM   | NAV1     |
| ZWILCH  | KLC4     |
| ALDOA   | KNSTRN   |
| ATXN2L  | MAP7     |
| CARHSP1 | PRC1     |
| CDT1    | CCT6A    |
| CENPN   | DNAJA3   |
| CENPT   | KIFC2    |
| CFDP1   | IGFN1    |
| CNOT1   | INA      |
| COTL1   | KRT75    |
| CYLD    | PDLIM1   |

| Type | Biological Process |       |       |       | Cellular Component |       |       |       | Molecular Function |      |       |       |       |       |       |       |         |
|------|--------------------|-------|-------|-------|--------------------|-------|-------|-------|--------------------|------|-------|-------|-------|-------|-------|-------|---------|
| GO   | 7029               | 10887 | 19230 | 35640 | 2102               | 99080 | 99081 | 71437 | 4672               | 8307 | 22842 | 30228 | 50544 | 99602 | 31013 | 48037 | 1901567 |

**Genes**

DCTN5 BOD1  
DDX19A COL23A1  
DDX19B NEXN  
DDX28 MYOM2  
DNAH3 ZNF804A  
DNAJA3 ARHGEF2  
DYNC1L1 ZW10  
DYNLRB2 MYOZ3  
EDC4 TPGS1  
ENKD1 TTC30A  
GAS8 RCSD1  
KAT8 DLGAP2  
KATNB1 SPECC1  
KIF22 PDLIM7  
KIFC3 HAUS8  
MAP1LC3B KIF3B  
MEFV RPL11  
MMP2 HOMER1  
MT3 FHL5  
MYH11 KIF23  
MYL10B1 BAG3  
NDE1 BAG2  
OGFOD1 SPAG6  
PLK1 KIF20B  
PPL FEZ1  
RPGRIPL1 MICAL2  
SNTB2 TTL4  
SOC1 PDE4DIP  
TNRC6A CEP57  
TUBB3 NOS1AP  
ZNF276 KNTC1  
ACTG1 SNPH  
APPBP2 HDAC4  
BAIAP2 CKAP5  
BCAS3 CDK1  
BIRC5 CEP170  
CASC3 KLHL21  
CDC27 KIF14  
CDK5R1 WDR1  
CDK5RAP3 CDC27  
CENPV SCO2  
CLTC  
COL1A1  
DCXR  
DNAH17  
DNAH2  
DNAH9  
DNAI2  
DYNLL2  
EVPL  
EVPLL  
FBF1

| Type | Biological Process |       |       |       | Cellular Component |       |       |       | Molecular Function |      |       |       |       |       |       |       |         |
|------|--------------------|-------|-------|-------|--------------------|-------|-------|-------|--------------------|------|-------|-------|-------|-------|-------|-------|---------|
| GO   | 7029               | 10887 | 19230 | 35640 | 2102               | 99080 | 99081 | 71437 | 4672               | 8307 | 22842 | 30228 | 50544 | 99602 | 31013 | 48037 | 1901567 |

**Genes**

FXR2  
 GAS2L2  
 GFAP  
 GRB7  
 HELZ  
 HID1  
 IGF2BP1  
 JUP  
 KANSL1  
 KIF18B  
 KIF19  
 KIF1C  
 KIF2B  
 KPNB1  
 KRT10  
 KRT12  
 KRT13  
 KRT14  
 KRT15  
 KRT16  
 KRT19  
 KRT20  
 KRT222  
 KRT23  
 KRT25  
 KRT26  
 KRT27  
 KRT28  
 KRT31  
 KRT32  
 KRT33A  
 KRT33B  
 KRT34  
 KRT35  
 KRT36  
 KRT37  
 KRT38  
 KRT39  
 KRT40  
 KRT9  
 MAPT  
 MFAP4  
 MIS12  
 MYH10  
 MYH13  
 MYH2  
 MYH3  
 MYH4  
 MYH8  
 MYL4  
 MYO1C  
 NARF

| Type | Biological Process |       |       |       | Cellular Component |       |       |       | Molecular Function |      |       |       |       |       |       |       |         |
|------|--------------------|-------|-------|-------|--------------------|-------|-------|-------|--------------------|------|-------|-------|-------|-------|-------|-------|---------|
| GO   | 7029               | 10887 | 19230 | 35640 | 2102               | 99080 | 99081 | 71437 | 4672               | 8307 | 22842 | 30228 | 50544 | 99602 | 31013 | 48037 | 1901567 |

**Genes**

NDEL1  
 NME2  
 NUFIP2  
 NUP85  
 PAFAH1B1  
 RAC3  
 RPTOR  
 SARM1  
 SCO1  
 SKAP1  
 SLC4A1  
 SMTNL2  
 SPAG5  
 SPECC1  
 TBCD  
 TEKT1  
 TEX14  
 TLK2  
 TNRC6C  
 TLL6  
 TUBD1  
 WIPF2  
 ZNF207  
 BOD1L2  
 FHOD3  
 HAUS1  
 KATNAL2  
 MAPRE2  
 MYL12B  
 MYOM1  
 NDC80  
 POLI  
 SEH1L  
 SKA1  
 SS18  
 TPGS2  
 TUBB6  
 YES1  
 ACTN4  
 ADAMTS10  
 ADAMTSL5  
 APC2  
 AURKC  
 BTBD2  
 CALM3  
 CAMSAP3  
 CASP14  
 CNOT3  
 COL5A3  
 CYP2A6  
 DAPK3  
 DNM2

| Type | Biological Process |       |       |       | Cellular Component |       |       |       | Molecular Function |      |       |       |       |       |       |       |         |
|------|--------------------|-------|-------|-------|--------------------|-------|-------|-------|--------------------|------|-------|-------|-------|-------|-------|-------|---------|
| GO   | 7029               | 10887 | 19230 | 35640 | 2102               | 99080 | 99081 | 71437 | 4672               | 8307 | 22842 | 30228 | 50544 | 99602 | 31013 | 48037 | 1901567 |

**Genes**

ELAVL1  
EML2  
FSD1  
GSK3A  
HAUS8  
HNRNPL  
HOOK2  
HRC  
KHSRP  
KLC3  
LMNB2  
LSM14A  
LSM4  
MAP2K2  
MISP  
MYBPC2  
MYH14  
MYO9B  
NANOS3  
ODF3L2  
RPL28  
RYR1  
SAMD4B  
SIRT2  
SPC24  
SYMPK  
TNNI3  
TNNT1  
TPGS1  
TPM4  
UPF1  
VMAC  
WTIP  
ZFP36  
SRC  
ARFGEF2  
AURKA  
BFSPI  
DSN1  
EIF6  
FKBP1A  
HCK  
JPH2  
KIF16B  
KIF3B  
MAPRE1  
MYH7B  
MYLK2  
NINL  
PABPC1L  
RASSF2  
SDC4

| Type | Biological Process |       |       |       | Cellular Component |       |       |       | Molecular Function |      |       |       |       |       |       |       |         |
|------|--------------------|-------|-------|-------|--------------------|-------|-------|-------|--------------------|------|-------|-------|-------|-------|-------|-------|---------|
| GO   | 7029               | 10887 | 19230 | 35640 | 2102               | 99080 | 99081 | 71437 | 4672               | 8307 | 22842 | 30228 | 50544 | 99602 | 31013 | 48037 | 1901567 |

**Genes**

SNPH  
STAU1  
TOP1  
TPX2  
TTLL9  
TUBB1  
COL6A1  
ICOSLG  
KCNE1  
PCNT  
RSPH1  
SUMO3  
SYNJ1  
TIAM1  
ADORA2A  
APOBEC3A  
APOBEC3C  
APOBEC3D  
APOBEC3H  
CENPM  
DNAL4  
EIF4ENIF1  
FBLN1  
GAS2L1  
GTSE1  
KLHL22  
MICAL3  
MOV10L1  
MYH9  
MYO18B  
NEFH  
PARVB  
POLDP3  
RAC2  
RAN
